# Supplementary material for: Nuclear Localization of HopA1Pss61 Is Required for Effector-Triggered Immunity
Source: Plants (Basel). 2021 Apr 28;10(5):888. doi: 10.3390/plants10050888 (PMC8145104; doi:10.3390/plants10050888)
Supplement: Supplementary file 1 [file plants-10-00888-s001.zip › plants-1168922-supplementary.pdf]

## Supplementary materials

# Nuclear Localization of HopA1<sub>Pss61</sub> Is Required for Effector-Triggered Immunity

Hobin Kang <sup>1</sup>, Quang-Minh Nguyen <sup>1</sup>, Arya Bagus Boedi Iswanto <sup>1</sup>, Jong Chan Hong <sup>1,2</sup>, Saikat Bhattacharjee <sup>3</sup>, Walter Gassmann <sup>4</sup> and Sang Hee Kim <sup>1,2,\*</sup>

<sup>1</sup> Division of Applied Life Science (BK21 Four Program), Plant Molecular Biology and Biotechnology Research Center, Gyeongsang National University, 501 Jinju-daero, Jinju 52828, Korea; he-good123@naver.com (H.K.); nguyenquangminh4595@gmail.com (Q.-M.N.); aryabagus62@gmail.com (A.B.B.I.); jchong@gnu.ac.kr (J.C.H.)

<sup>2</sup> Division of Life Science, Gyeongsang National University, 501 Jinju-daero, Jinju 52828, Korea

<sup>3</sup> Laboratory of Signal Transduction and Plant Resistance, UNESCO—Regional Centre for Biotechnology (RCB), NCR—Biotech Science Cluster, 3rd Milestone, Faridabad-Gurgaon Expressway, Faridabad-121 001, India; saikat@rcb.res.in

<sup>4</sup> Division of Plant Sciences, Christopher S. Bond Life Sciences Center and Interdisciplinary Plant Group, University of Missouri, Columbia, MO 65211, USA; gassmannw@missouri.edu

\* Correspondence: sangheekim@gnu.ac.kr

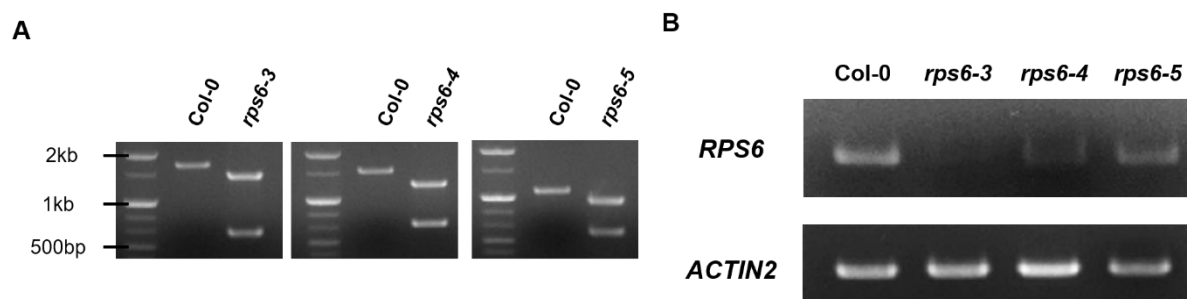

**Supplementary Figure S1.** (A) Genotyping analysis from 3 independent T-DNA lines of *RPS6*. Amplicons were obtained from LP, RP, and LB primers combination. (B) RT-PCR analysis of *RPS6* transcripts in Col-0, *rps6-3*, *rps6-4* and *rps6-5*. *ACTIN2* was used as a loading control. *RPS6*-specific primers used to amplify transcripts are listed in Table S1.

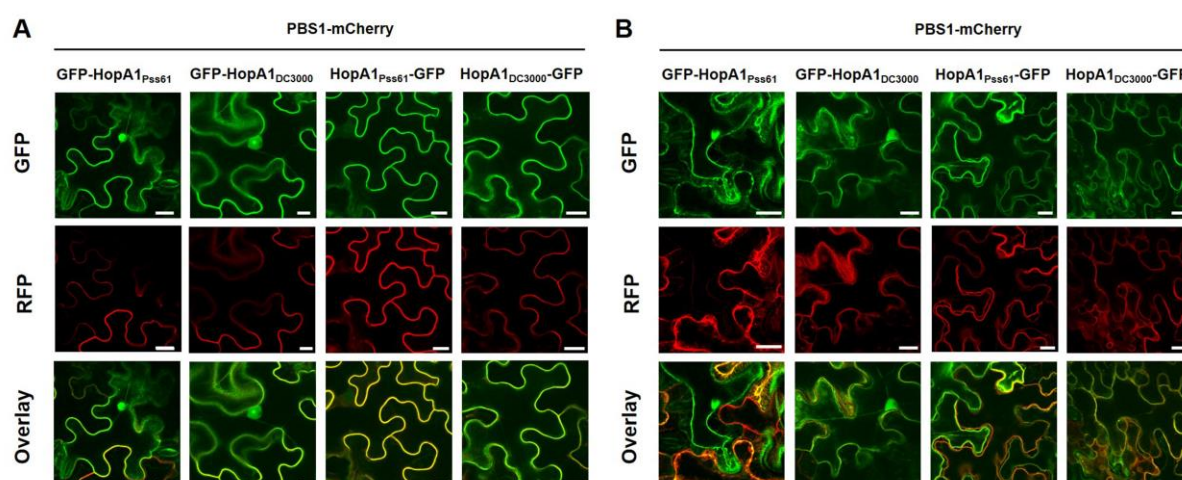

**Supplementary Figure S2.** Both HopA1<sub>Pss61</sub> and HopA1<sub>DC3000</sub> were localized to the plasma membrane. *GFP-hopA1<sub>Pss61</sub>*, *hopA1<sub>Pss61</sub>-GFP*, *GFP-hopA1<sub>DC3000</sub>* and *hopA1<sub>DC3000</sub>-GFP* fusion constructs were transiently expressed in *N. benthamiana* leaves with *PBS1-mCherry*, a PM marker gene. Localization of both HopA1 was verified in the absence (A) or the presence (B) of 0.8 M Mannitol treatment. Yellow fluorescence indicates a co-localization between HopA1s and PBS1. Scale bar: 20  $\mu$ m.

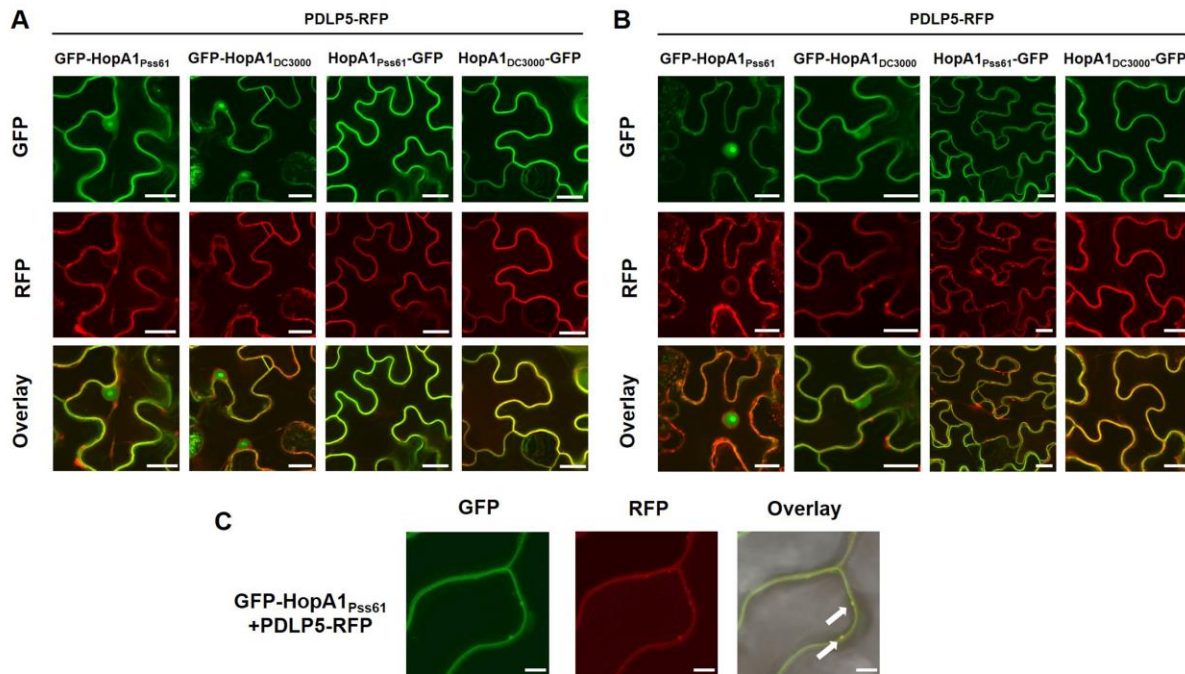

**Supplementary Figure S3.** HopA1<sub>Pss61</sub> was localized to the plasma membrane and plasmodesmata. *GFP-hopA1<sub>Pss61</sub>*, *hopA1<sub>Pss61</sub>-GFP*, *GFP-hopA1<sub>DC3000</sub>* and *hopA1<sub>DC3000</sub>-GFP* fusion constructs were transiently expressed in *N. benthamiana* leaves with *RFP-PDLP5*, a PM and PD marker gene. Localization of both HopA1 was verified in the absence (A) or the presence (B) of 0.8 M Mannitol treatment. Yellow fluorescence indicates a co-localization between HopA1s and PDLP5. Scale bar: 20  $\mu$ m.

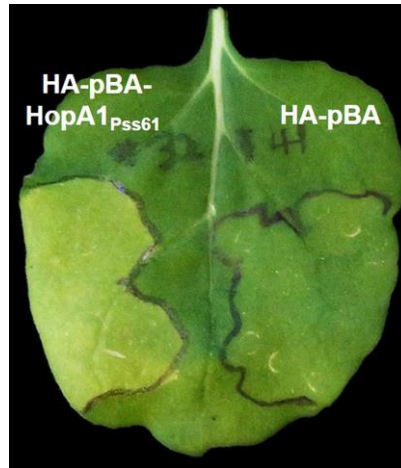

**Supplementary Figure S4.** HA-HopA1<sub>Pss61</sub> induced cell death in *N.benthamiana*. HA-pBA-HopA1<sub>Pss61</sub> and HA-pBA were transiently expressed in *N.benthamiana*. Agrobacterium adjusted to an OD<sub>600</sub> of 0.2. Phenotypes were recorded at 4 days post-inoculation.

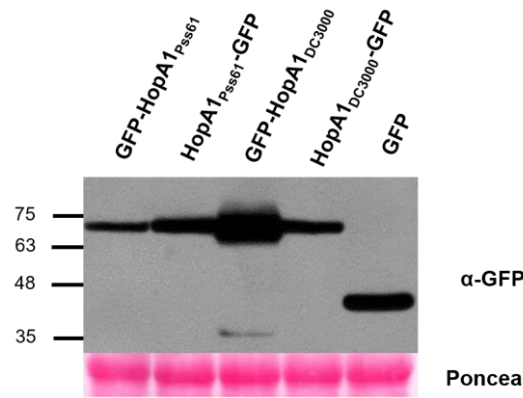

**Supplementary Figure S5.** Expression of GFP-HopA1<sub>Pss61</sub>, HopA1<sub>Pss61</sub>-GFP, GFP-HopA1<sub>DC3000</sub> and HopA1<sub>DC3000</sub>-GFP in samples shown in Figures 2A and 2B was confirmed by western blot with anti-GFP antibody. Total protein was extracted from four-leaf discs at 2 days post inoculation. Total protein staining (Ponceau S) confirmed equal loading in western blot analysis.

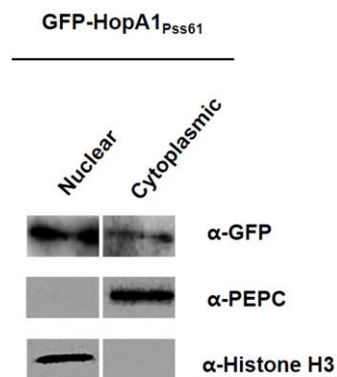

**Supplementary Figure S6.** HopA1<sub>Pss61</sub> was accumulated in the nucleus and cytoplasm. HopA1<sub>Pss61</sub>-inoculated samples were separated into the nuclear and cytoplasmic fractions. Expression of HopA1<sub>Pss61</sub> in each fraction was detected by western blot. Phosphoenolpyruvate carboxylase (PEPC) and Histone H3 were used as cytoplasmic and nuclear marker proteins, respectively. The nuclear fraction is ten-fold concentrated compared with the cytoplasmic fraction.

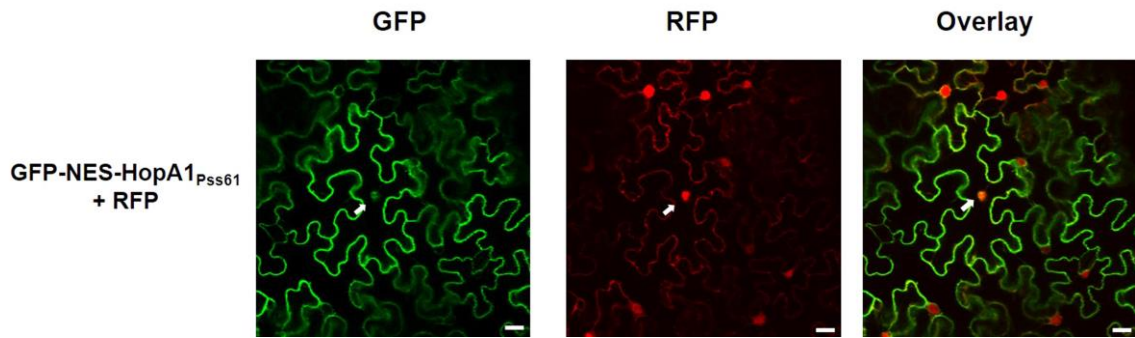

**Supplementary Figure S7.** Residual localization of GFP-NES-HopA1<sub>Pss61</sub> in the nucleus. Nuclear localization of GFP-NES-HopA1<sub>Pss61</sub> was found in a few cells (less than one nuclear localization among ten transformations). *GFP-hopA1<sub>Pss61</sub>* or *GFP-NES-hopA1<sub>Pss61</sub>* constructs with *RFP* were transiently expressed in *N. benthamiana* leaves using *Agrobacterium* adjusted to an OD<sub>600</sub> of 0.2. Cells expressing fusion proteins were analyzed 2 days after infiltration by an Olympus fluoview FV1000 confocal microscope under GFP fluorescence (left), RFP fluorescence (middle) and GFP/RFP overlay (right). Scale bar: 20  $\mu$ m.

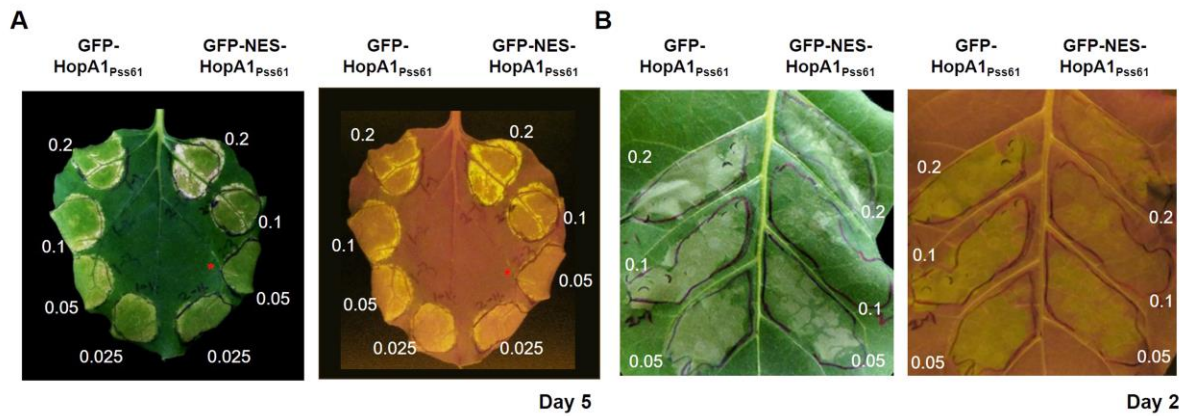

**Supplementary Figure S8.** GFP-NES-HopA1<sub>Pss61</sub> partially suppresses cell death. *GFP-hopA1<sub>Pss61</sub>* and *GFP-NES:hopA1<sub>Pss61</sub>* constructs were transiently expressed in (A) *N. benthamiana* using *Agrobacterium* adjusted OD<sub>600</sub> ranging from 0.025 to 0.2 and (B) *N. tabacum* cv. Xanthi using *Agrobacterium* adjusted to an OD<sub>600</sub> ranging from 0.05 to 0.2. The photographs were taken under visible light (left) and UV light (right) at (A) 5 days post inoculation and (B) 2 days post inoculation.

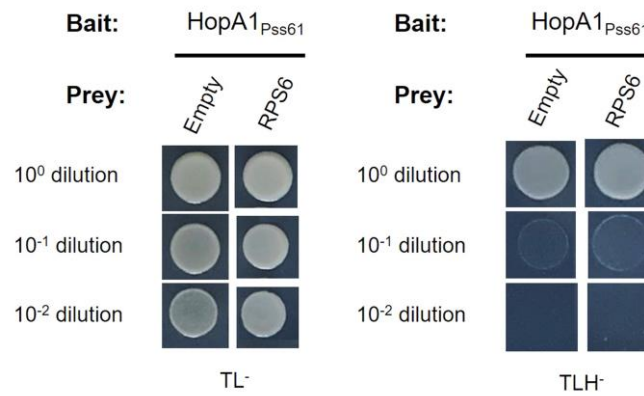

**Supplementary Figure S9.** HopA1<sub>Pss61</sub> does not interact with RPS6 in yeast two-hybrid assay. HopA1<sub>Pss61</sub> and RPS6 were used as bait and prey, respectively. -TL, medium lacking Trp and Leu (selection for prey and bait vectors); -TLH, medium lacking Trp, Leu and His (selection for bait and prey interaction).

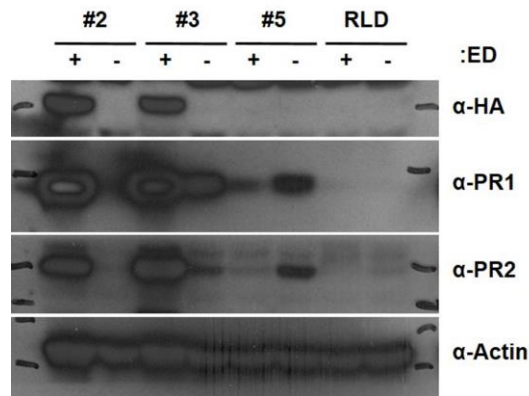

**Supplementary Figure S10.** Induction of HopA1<sub>Pss61</sub> triggers accumulation of defense-related proteins. Total proteins were isolated in estradiol-HopA1<sub>Pss61</sub> transgenic plants (line #2, line #3 and line #5) at 48h after spraying estradiol (+) or ethanol (-). Immunoblots were analyzed with the indicated antibodies.

**Supplementary Table S1.** Primers used in this study

| Primer               | Sequences (5'-3')                                                      | Purpose                            |
|----------------------|------------------------------------------------------------------------|------------------------------------|
| 46460 LP             | CTCTGGAAC TTTGCCG TTC                                                  | Genotyping                         |
| 46460 RP             | CCCAACTTGATGATCAAGCC                                                   | Genotyping                         |
| rps6-3 LP            | TGCCTTAACGAGCTACTGGA                                                   | Genotyping                         |
| rps6-3 RP            | ATAGTCGAAGCGTTCCGGTAAGT                                                | Genotyping                         |
| rps6-4 LP            | ACTTACCGGAACGCTTCGACTAT                                                | Genotyping                         |
| rps6-4 RP            | CCCCACTGGTACGGTGAGTG                                                   | Genotyping                         |
| rps6-5 LP            | GGAGAGTGGCGTTGGCTG                                                     | Genotyping                         |
| rps6-5 RP            | GGACTCCCTAATTGCATGT                                                    | Genotyping                         |
| 46490 LP             | GCTGGTGTCTTAACGAGTTGC                                                  | Genotyping                         |
| 46490 RP             | CTACCCCGCAGATACTTACCC                                                  | Genotyping                         |
| 46500 LP             | GGCTTCAGAAACATGTGGAAG                                                  | Genotyping                         |
| 46500 RP             | TCTTIGTCCAATACACCCTCC                                                  | Genotyping                         |
| 46510 LP             | GGAGAACCGACTTGGAATCC                                                   | Genotyping                         |
| 46510 RP             | CGGCAGCAAACTACTCATTC                                                   | Genotyping                         |
| 46520 LP             | GGCTTGAGAAACATGTGGAAG                                                  | Genotyping                         |
| 46520 RP             | CTTGAGCTCTGGAATATCCC                                                   | Genotyping                         |
| LB1.3(Salk)          | ATTTTGCCGATTTTCGGAAC                                                   | Genotyping                         |
| RPS6 RT Forward      | CCCGAGTTTCAGCGGAGAAG                                                   | RT-PCR                             |
| RPS6 RT Reverse      | AATGGTCGTTTTGCCAATTC                                                   | RT-PCR                             |
| Actin 2 Forward      | TCGGTGGTTCCATTCTTGCT                                                   | RT-PCR                             |
| Actin 2 Reverse      | GCTTTTAAAGCCTTTGATCTTGAGAG                                             | RT-PCR                             |
| NES-HopA1 Forward    | ATGCTGCCTCCTCTGGAAC-<br>GCCTGACTCTGGTGAACCCTATCCATGCACG                | Add NES Sequence in front of HopA1 |
| GW-NES-HopA1 Forward | GGGGACAAGTTTGTACAAAAA-<br>GCAGGCTCAATGCTGCCTCCTCTGGAAC-<br>GCCTGACTCTG | Use in Gateway system              |
| GW-NES-HopA1 Reverse | GGGGACCACTTTGTACAAGAAAGCTGGGTATCAG-<br>TTTCGCGCCCTGAG                  | Use in Gateway system              |
